# Supplementary material for: Assessment of DNA-binding affinity of cholinesterase reactivators and electrophoretic determination of their effect on topoisomerase I and II activity
Source: Royal Society of Chemistry journal article supplement (doi:10.1039/c6mb00332j), 2016-07-06
Supplement: c6mb00332j1.pdf [file c6mb00332j1.pdf]

## Assessment of DNA-binding affinity of cholinesterase reactivators and electrophoretic determination of their effect on topoisomerase I and II activity

Janockova J.<sup>a,b</sup>, Zilecka E.<sup>a</sup>, Kasparkova J.<sup>c</sup>, Brabec V.<sup>c</sup>, Soukup O.<sup>d</sup>, Kuca K.<sup>b</sup>,  
Kozurkova M.<sup>a,b</sup>

<sup>a</sup>Institute of Chemistry, Department of Biochemistry, Faculty of Science, P. J. Safarik University, Moyzesova 11, 040 01 Kosice, Slovak Republic

<sup>b</sup>Biomedical Research Center, University Hospital Hradec Kralove, Sokolska 581, 500 05 Hradec Kralove, Czech Republic

<sup>c</sup>Department of Biophysics, Faculty of Science, Palacky University, Slechtitelu 27, 783 71 Olomouc, Czech Republic

<sup>d</sup>Department of Toxicology and Military Pharmacy, Faculty of Military Health Sciences, University of Defense, Trebesska 1575, 500 01 Hradec Kralove, Czech Republic

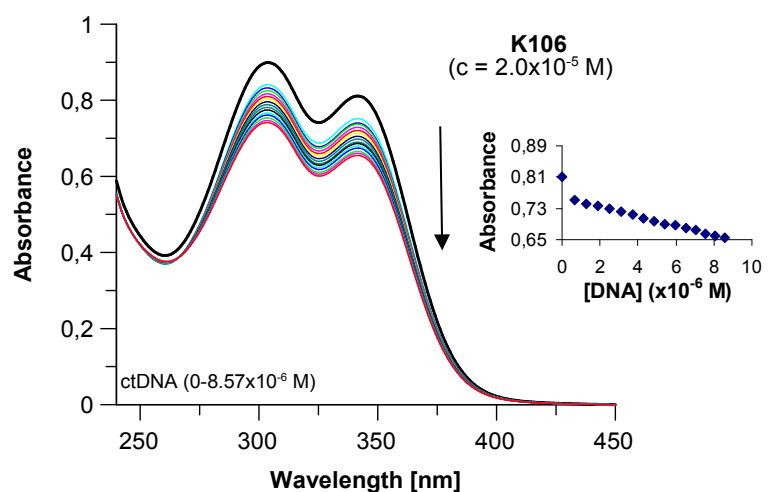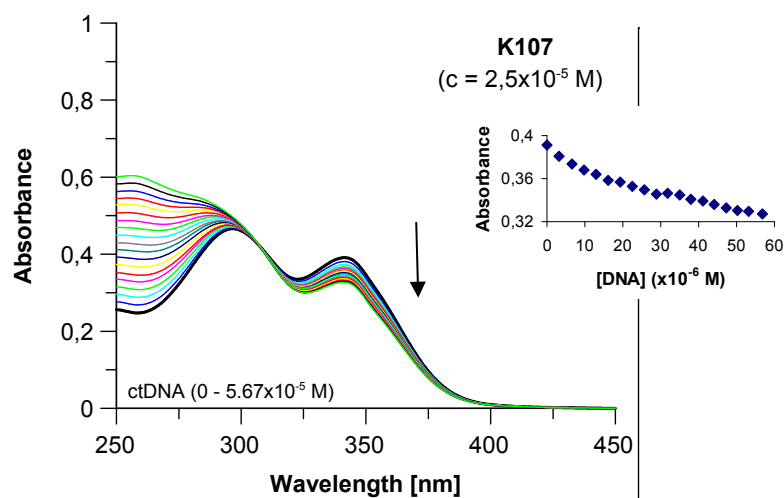

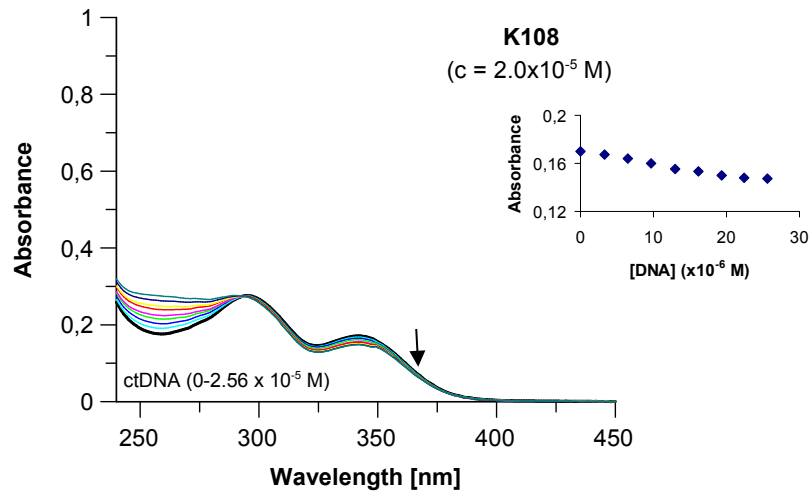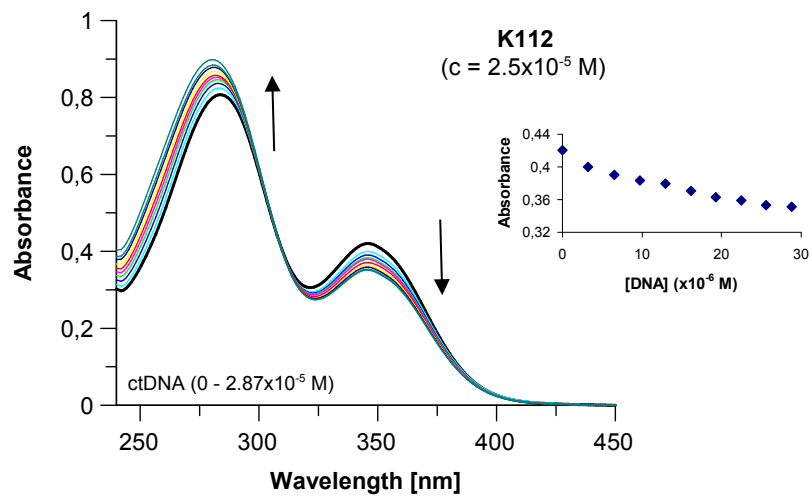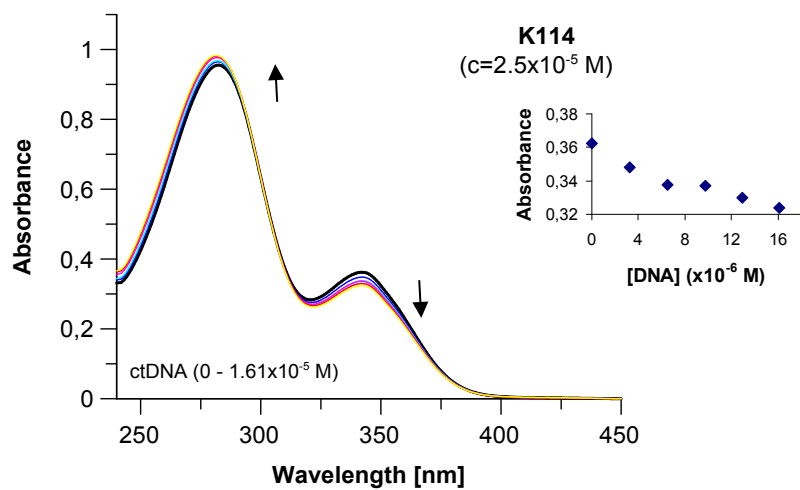

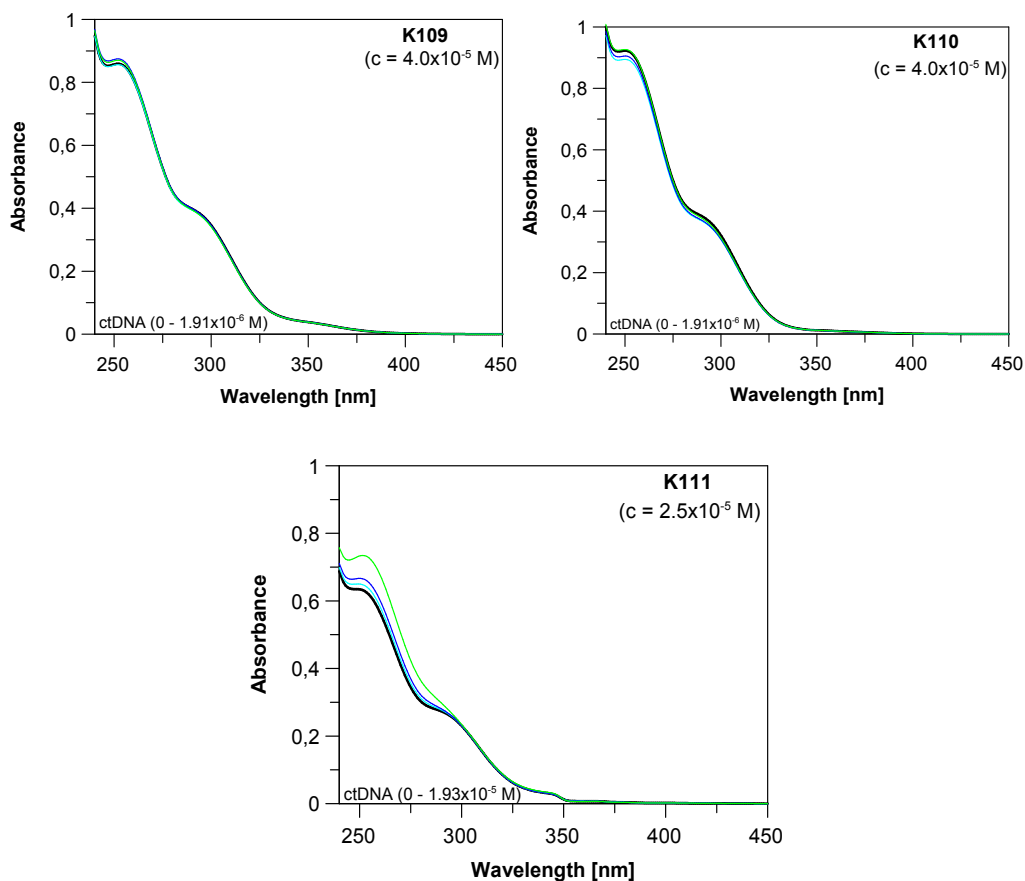

**Figure S1** UV-Vis titration spectra of studied reactivators **K106-K114** (upper black line, except for **K113**) with increasing concentration of ctDNA (color lines). Spectra were measured in 0.01 M Tris-HCl (pH=7.4) at room temperature. Concentrations for reactivators and ctDNA are mentioned in graphs. Arrows indicate the changes after addition of increasing concentration of ctDNA. Inserted graphs (by compounds **K106-K108** and **K112-K114**) represent the non-linear fitting of absorption titrations, the plot of [DNA] versus absorbance.

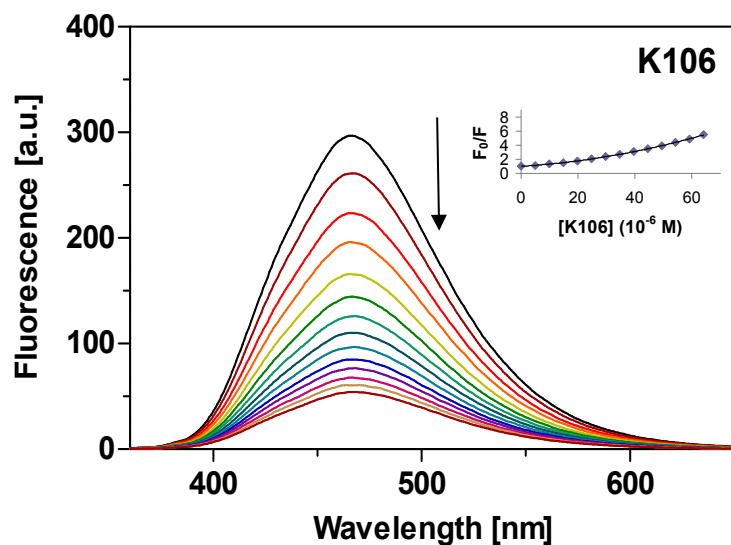

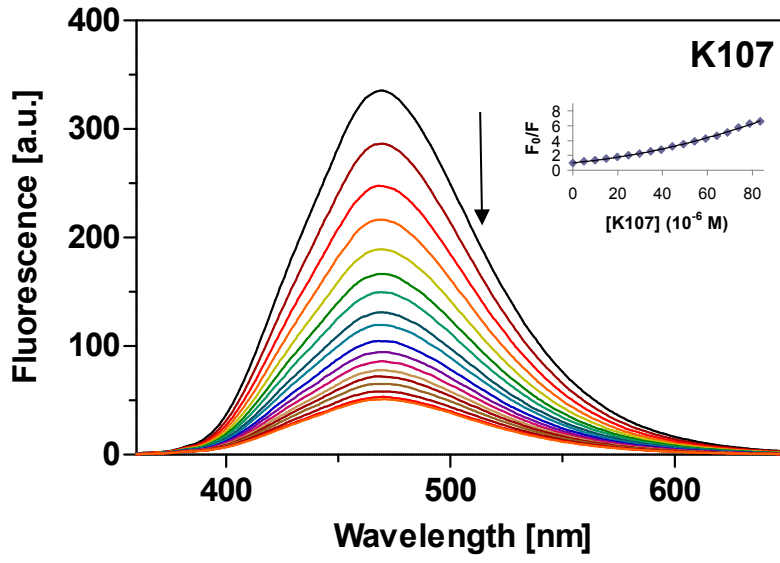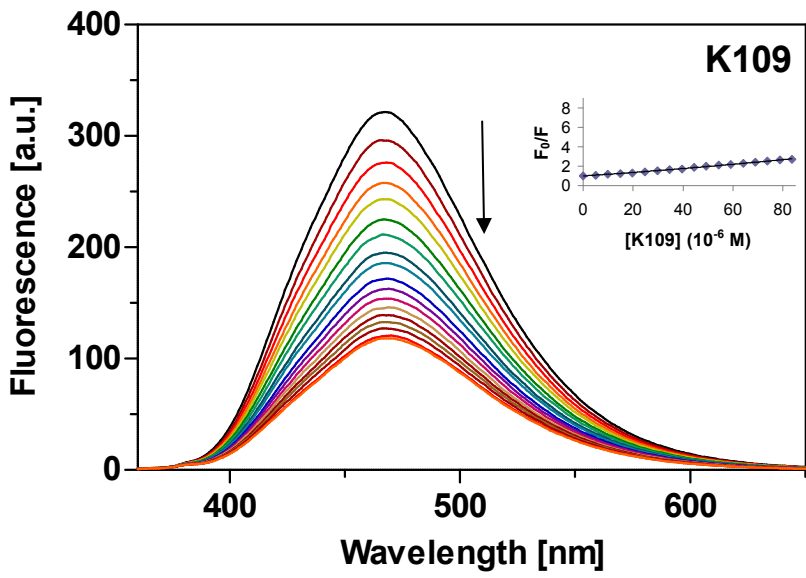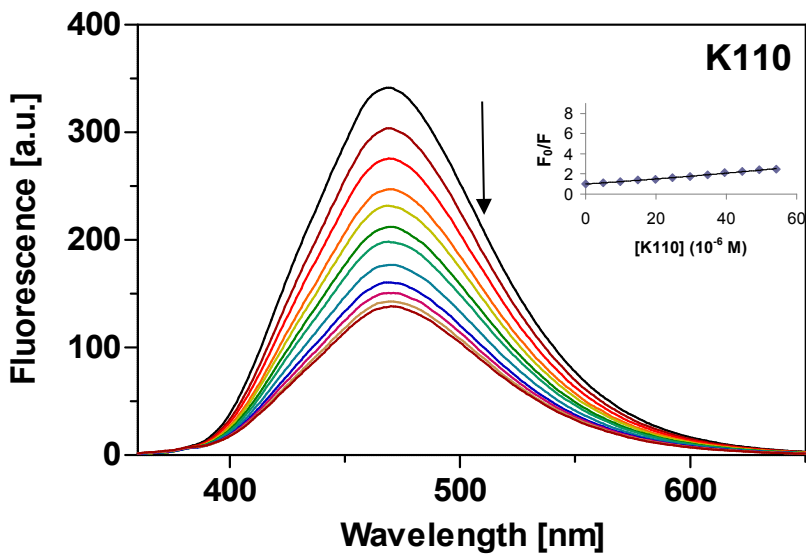

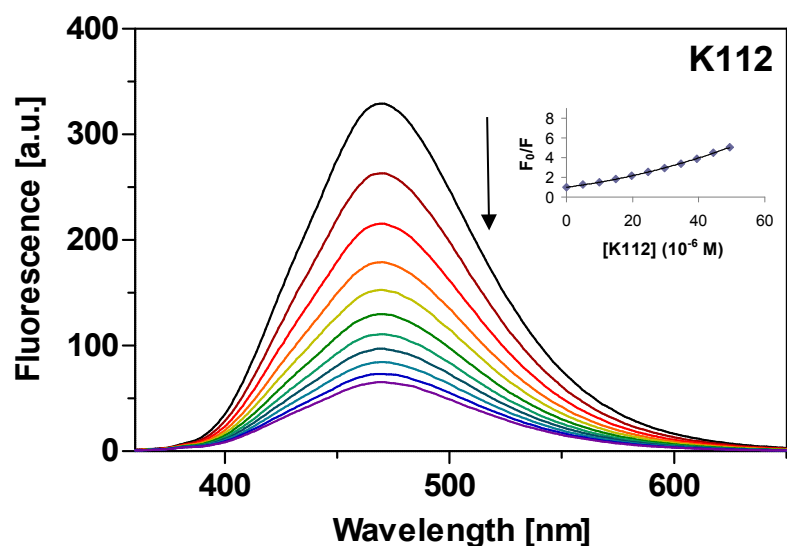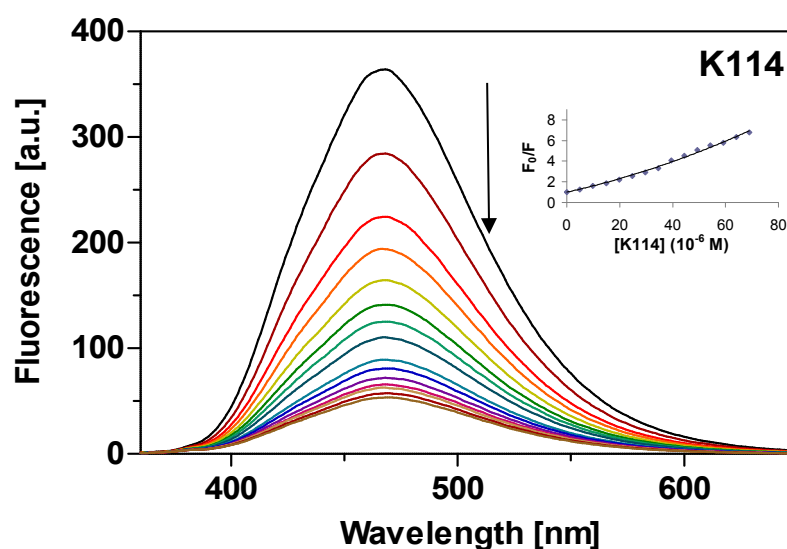

**Figure S2** Fluorescence titration spectra of Hoechst-ctDNA complex (black upper line) with increasing concentration of studied compounds K106-K114 (except for K113, color lines). Spectra were measured in 0.01 M Tris-HCl (pH=7.4) at room temperature. Arrows show the emission intensity changes upon increasing sample concentration. The inserted graphs represent the Stern-Volmer plot. Plot of  $F_0/F$  versus [quencher] at room temperature.  $F_0$  is fluorescence of Hoechst - ctDNA complex;  $F$  is fluorescence of complex after proportional addition of ligands.

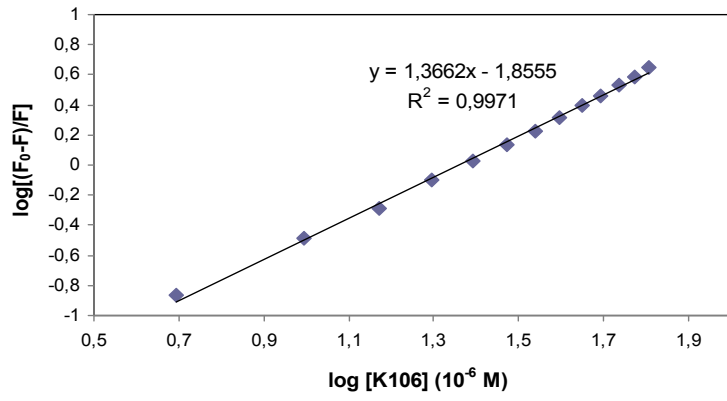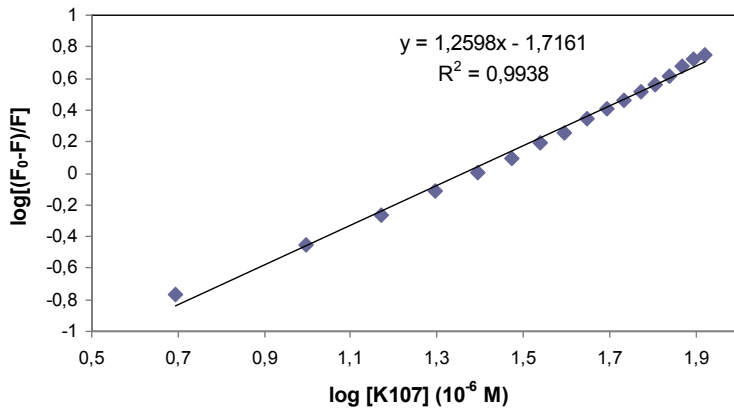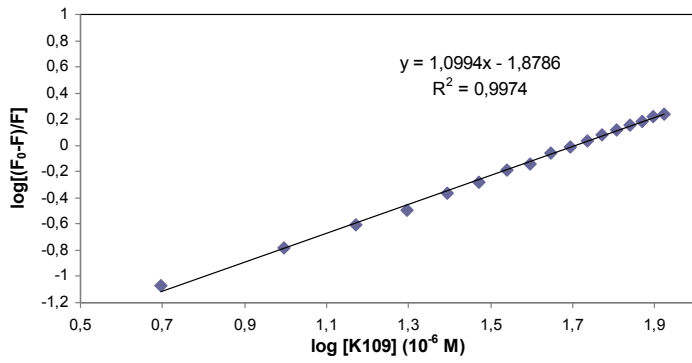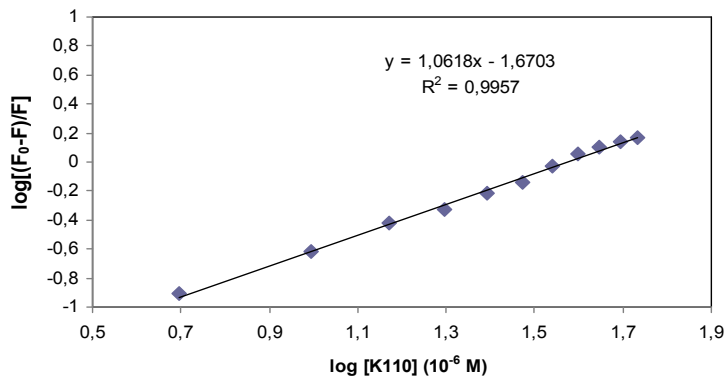

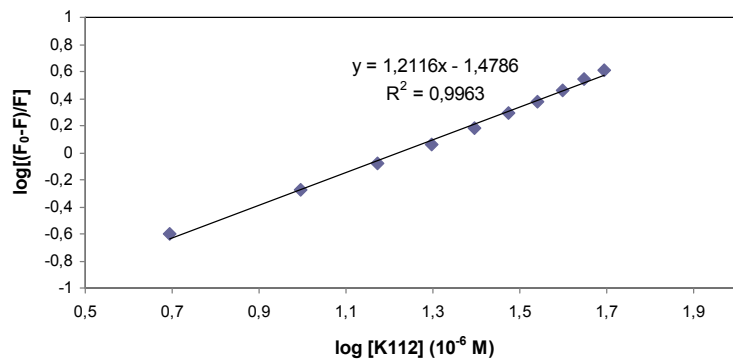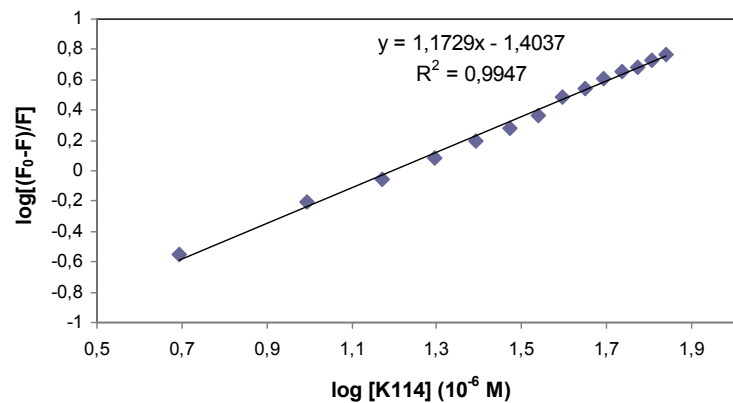

Figure S3 Modified Stern-Volmer plot of  $\log[(F_0-F)/F]$  versus  $\log[Q] \times 10^{-6} \text{ M}$ .

**K106**

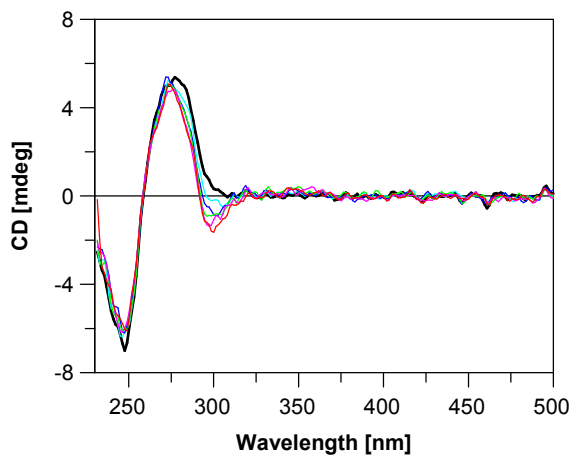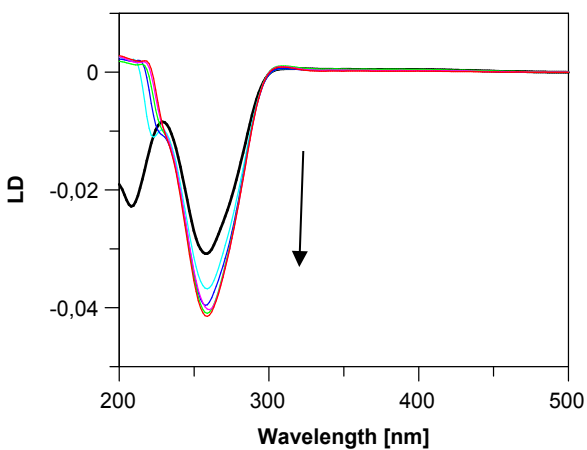

### K107

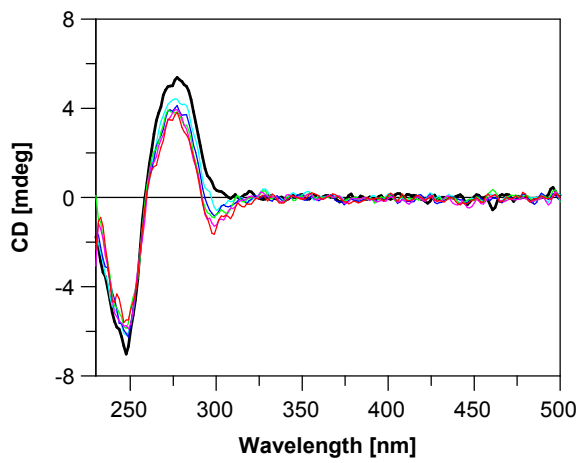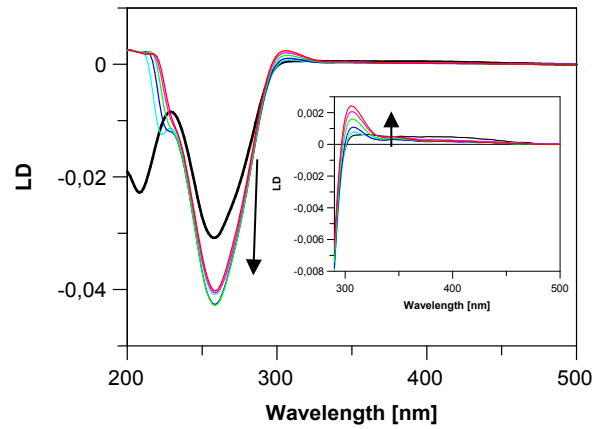

### K108

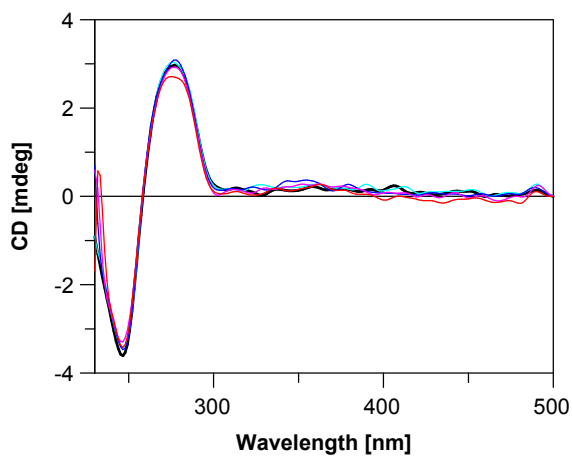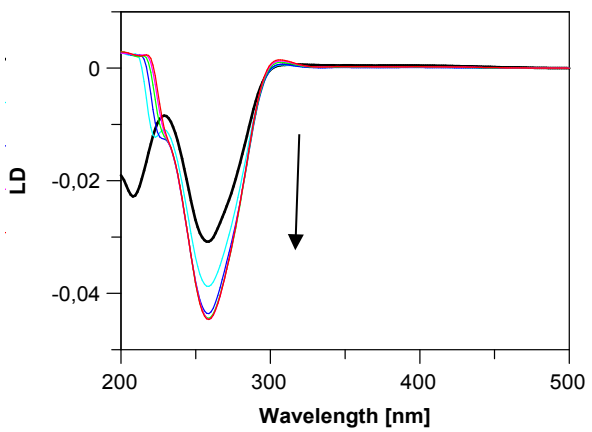

### K109

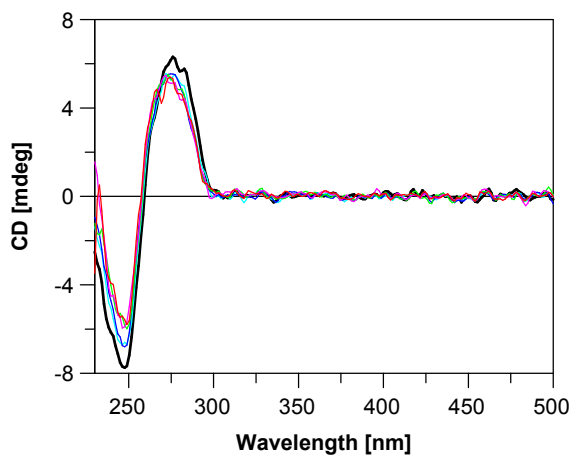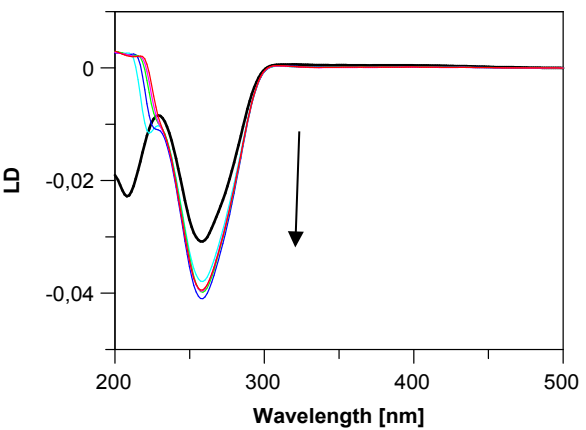



### K110

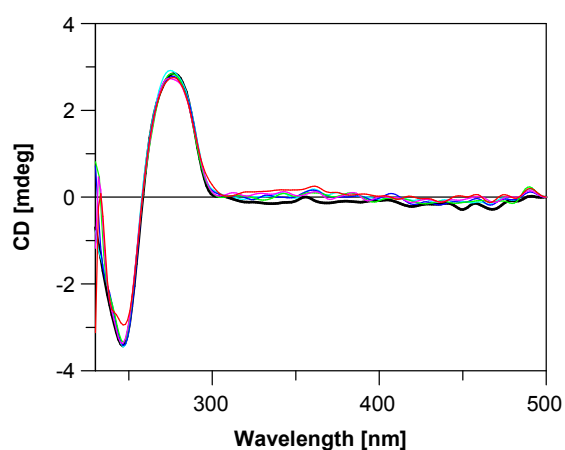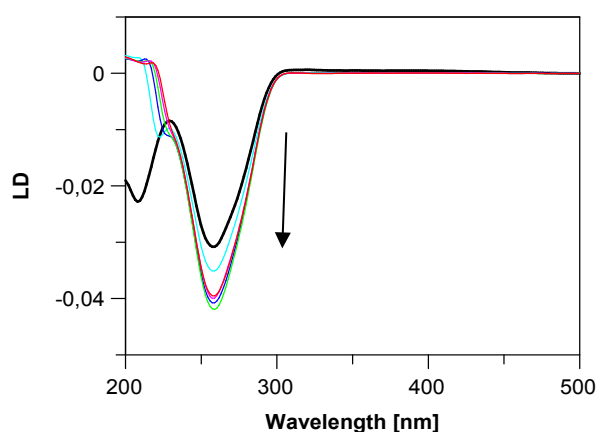

### K112

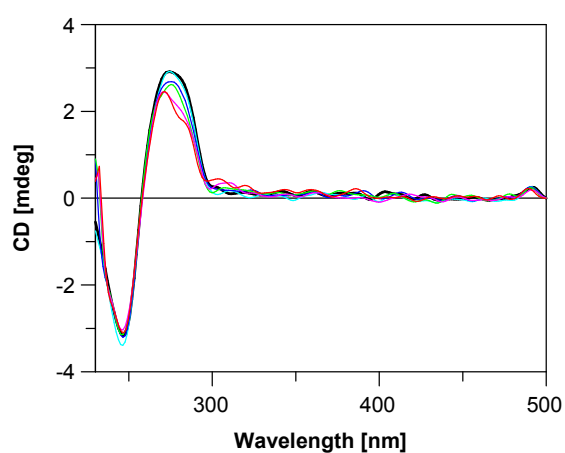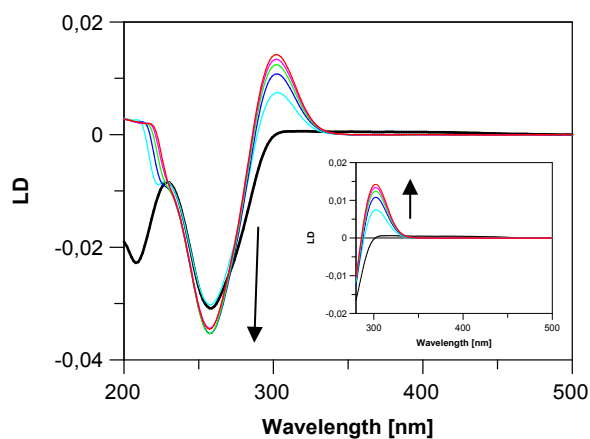

### K114

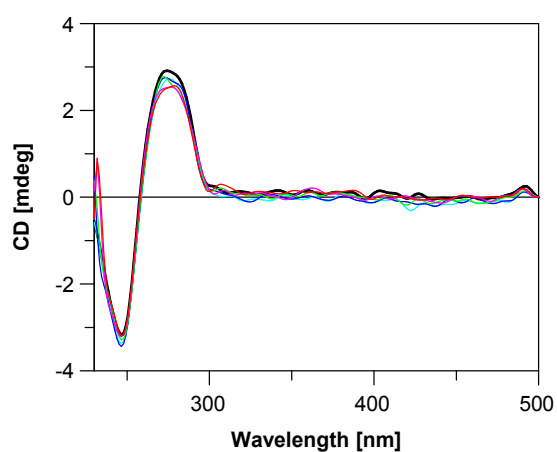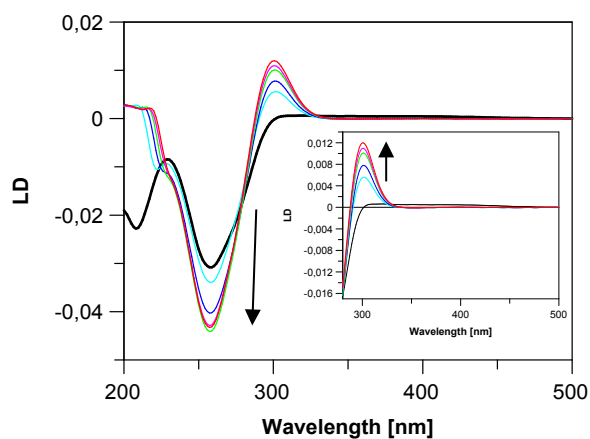

**Figure S4** Effect of studied reactivators **K106-K114** (except for K113, color lines, CD:  $0 - 0.5 \times 10^{-3}$  M, LD:  $0 - 2 \times 10^{-4}$  M) on ctDNA (black line, CD:  $7.46 \times 10^{-4}$  M, LD:  $3 \times 10^{-4}$  M). CD (left) and LD spectra (right) in 0.01 M Tris-HCl buffer (pH = 7.4).
